# Supplementary material
Source: publisher figshare collection journal article supplement (https://acs.figshare.com/ndownloader/files/4628923)

### **Supplement information:**

#### **Fig. 8. Doxycycline-induced post-translational modification of elfin protein.**

The magnified inserts of Coomassie stained 2-DE gels represent HEK 293 cells transfected with pBI-PRNP-EGFP vector (panel A) or pBI-DsRed-EGFP vector (panel B) in the absence of Dox. The protein spot identified as elfin is indicated by arrows in panels B and D. Note no apparent difference in molecular weight of elfin between panels A and B whereas a prominent descend of elfin's molecular weight is clearly visible in the inserts of 2-DE gels representing HEK 293 cells transfected with pBI-PRNP-EGFP vector (panel C) and pBI-DsRed-EGFP vector (panel D) in the presence of 1µg/ml of Dox. Our experimental conditions suggest that the observed mobility shift of elfin is solely an effect of Dox. The location of elfin (spot number 113.) on 2-DE gel is shown in Figure 2A.

#### **Fig. 9. Expression of cell type specific markers in Prnp<sup>0/0</sup> cell line.**

Immunocytochemical characterization of Prnp<sup>0/0</sup> cell line using anti-synaptophysin (panel A), anti-NF 200 kDa (panel B), anti-nestin (panel C), anti-vimentin (panel D) and anti-GFAP (panel E) antibody. Synaptophysin immunostaining resulted in a strong positive reaction whereas expression of NF-200 kDa was comparably weak. A further neuronal marker, nestin, which is highly expressed during development gave a moderate signal suggesting that Prnp<sup>0/0</sup> cells have neuronal origin but are not yet fully differentiated. In addition, vimentin and GFAP, markers of mesenchymal and glial origin, gave no signal.

**Fig. 10. Western blot analysis of Anxa V after constitutive overexpression of PrP<sup>C</sup> in HEK 293 cells.** Upper panel: Anxa V regulation after transient transfection of HEK 293 cells either with control pCMS-EGFP (lane 1) or pCMS-PRNP-EGFP constitutive expression vector (lane 2). Note a marked PrP<sup>C</sup>-induced up-regulation of Anxa V (lane 2) as compared to the control (lane 1). Lower panel:  $\beta$ -actin expression as a control for an equal protein load. Both lanes were loaded with 10  $\mu$ g of proteins. This Western blot is representative of three different experiments.

**Supporting Information Figure 8**

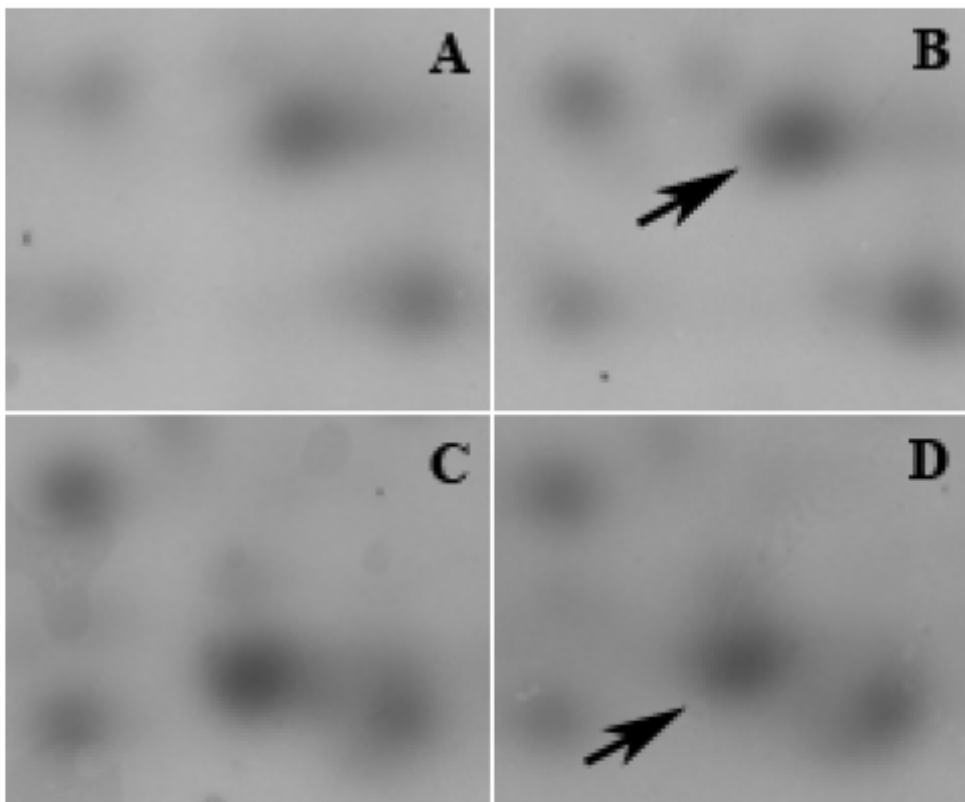

Supporting Information Figure 9

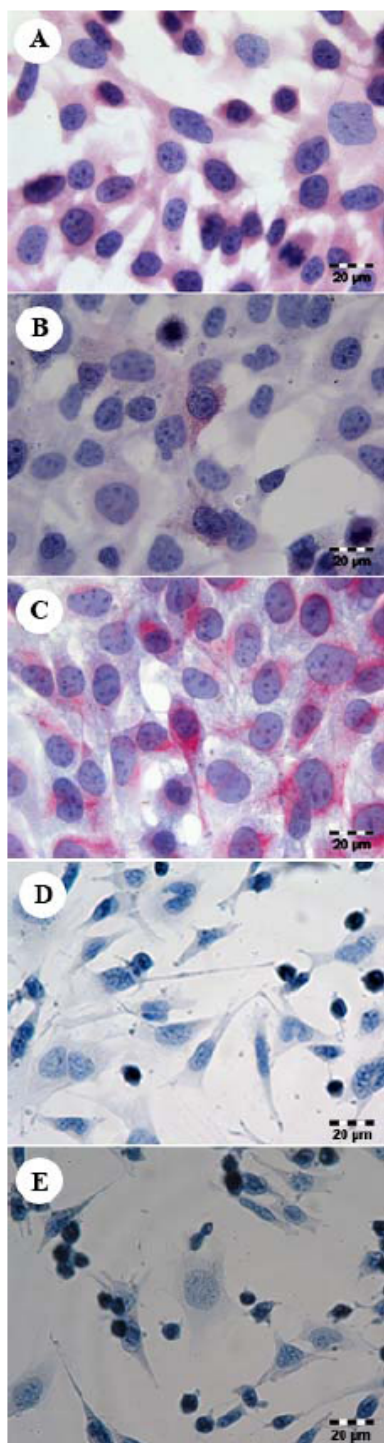

Supporting Information Figure 10

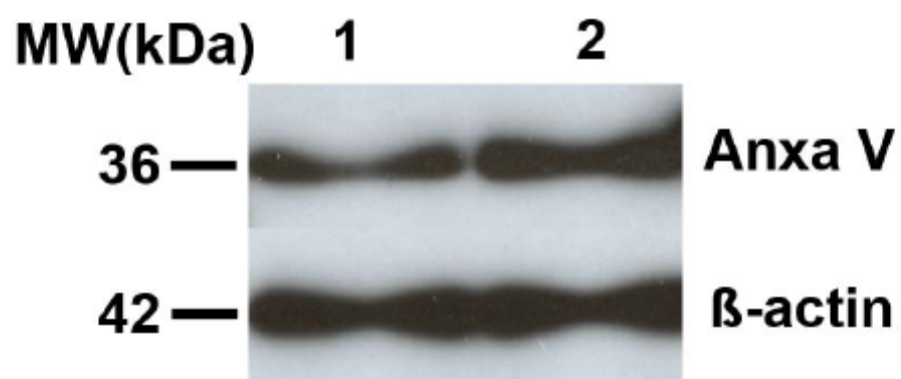

Supplement: Supplementary file 1 [file 4628923]
